# Supplementary material
Source: HighWire-hosted journal article supplement (https://erj.ersjournals.com/content/59/6/2200520)
Supplement: inline-supplementary-material-1 [file inline-supplementary-material-1.pdf]

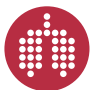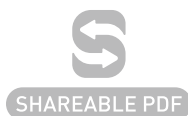

# Inaccuracy of pulse oximetry in darker-skinned patients is unchanged across 32 years

Martin J. Tobin and Amal Jubran 

Division of Pulmonary and Critical Care Medicine, Hines Veterans Affairs Hospital and Loyola University of Chicago Stritch School of Medicine, Hines, IL, USA.

Corresponding author: Martin J. Tobin ([mtobin2@lumc.edu](mailto:mtobin2@lumc.edu))

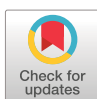

Shareable abstract (@ERSpublications)

**The structure of pulse oximeters has changed tremendously over time, but inaccurate readings of oxygen saturation in black patients have not improved across 32 years and manufacturers do not report efforts to resolve the problem** <https://bit.ly/3KYc7Zo>

**Cite this article as:** Tobin MJ, Jubran A. Inaccuracy of pulse oximetry in darker-skinned patients is unchanged across 32 years. *Eur Respir J* 2022; 59: 2200520 [DOI: 10.1183/13993003.00520-2022].

This single-page version can be shared freely online.

Copyright ©The authors 2022. For reproduction rights and permissions contact [permissions@ersnet.org](mailto:permissions@ersnet.org)

Received: 11 March 2022  
Accepted: 15 March 2022

*To the Editor:*

We read with interest the recent report in the *European Respiratory Journal* by CROOKS *et al.* [1], who document greater errors with pulse oximetry in patients who have dark skin pigmentation than in white patients. The study is important because of the large number of data points collected prospectively.
